# Supplementary material for: Pregnancy at very advanced maternal age: a UK population‐based cohort study
Source: PubMed Central journal article supplement — BJOG. 2016 Sep 1;124(7):1097–106. doi: 10.1111/1471-0528.14269 (PMC5484369; doi:10.1111/1471-0528.14269), 2016-09-01
Supplement: BJO-124-1097-s002.pdf [file BJO-124-1097-s002.pdf]

**Table S1.** Further analysis of pregnancy complications, adjusting for socio-demographic factors, previous medical history and relevant pregnancy related factors one at a time

|                                               | Model 3a                 |                   | Model 3b                 |               | Model 3c             |         | Model 3d                 |                   |
|-----------------------------------------------|--------------------------|-------------------|--------------------------|---------------|----------------------|---------|--------------------------|-------------------|
|                                               | Adjusted OR (95% CI)     | P-value           | Adjusted OR (95% CI)     | P-value       | Adjusted OR (95% CI) | P-value | Adjusted OR (95% CI)     | P-value           |
| <b>Any gestational hypertensive disorder</b>  |                          |                   |                          |               |                      |         |                          |                   |
| No                                            | 1                        |                   | 1                        |               | 1                    |         |                          |                   |
| Yes                                           | <b>3.15 (1.76-5.65)</b>  | <b>0.0001</b>     | <b>2.12 (1.15-3.90)</b>  | <b>0.0158</b> | 1.8 (0.72-4.53)      | 0.2103  |                          |                   |
| <b>Pregnancy induced hypertension</b>         |                          |                   |                          |               |                      |         |                          |                   |
| No                                            | 1                        |                   | 1                        |               | 1                    |         |                          |                   |
| Yes                                           | <b>3.06 (1.47-6.40)</b>  | <b>0.0029</b>     | <b>2.76 (1.30-5.85)</b>  | <b>0.0083</b> | 1.97 (0.63-6.19)     | 0.2431  |                          |                   |
| <b>Preeclampsia</b>                           |                          |                   |                          |               |                      |         |                          |                   |
| No                                            | 1                        |                   | 1                        |               | 1                    |         |                          |                   |
| Yes                                           | <b>2.79 (1.15-6.74)</b>  | <b>0.0227</b>     | 1.2 (0.44-3.22)          | 0.7242        | 1.44 (0.33-6.27)     | 0.6277  |                          |                   |
| <b>Gestational diabetes requiring insulin</b> |                          |                   |                          |               |                      |         |                          |                   |
| No                                            | 1                        |                   | 1                        |               | 1                    |         |                          |                   |
| Yes                                           | <b>7.89 (1.64-38.00)</b> | <b>0.01</b>       | <b>8.62 (1.76-42.14)</b> | <b>0.0078</b> | 3.54 (0.43-29.36)    | 0.2408  |                          |                   |
| <b>Diagnosed postpartum haemorrhage</b>       |                          |                   |                          |               |                      |         |                          |                   |
| No                                            | 1                        |                   | 1                        |               | 1                    |         | 1                        |                   |
| Yes                                           | <b>1.9 (1.23-2.93)¥</b>  | <b>0.0038</b>     | 1.44 (0.91-2.27)¥        | 0.1198        | 1.67 (0.87-3.23)¥    | 0.1247  | <b>1.9 (1.23-2.94)¥</b>  | <b>0.0038</b>     |
| <b>Gestational age at delivery (weeks)</b>    |                          |                   |                          |               |                      |         |                          |                   |
| Term (37+ weeks)                              | 1                        |                   | 1                        |               | 1                    |         | 1                        |                   |
| Iatrogenic preterm (<37 weeks)                | <b>4.81 (2.44-9.47)¥</b> | <b>&lt;0.0001</b> | 1.93 (0.90-4.15)¥        | 0.0909        | 1.66 (0.59-4.67)¥    | 0.3367  | <b>4.57 (2.33-8.96)¥</b> | <b>&lt;0.0001</b> |
| Spontaneous preterm (<37 weeks)               | <b>2.53 (1.16-5.54)¥</b> | <b>0.0198</b>     | 1.37 (0.58-3.21)¥        | 0.4684        | 1.83 (0.60-5.57)¥    | 0.2901  | <b>2.43 (1.12-5.29)¥</b> | <b>0.025</b>      |

Model 3a - adjusted for socio-demographic factors (Ethnic group, marital status, socio-economic group, body mass index and smoking status) plus previous medical history (previous uterine surgery not including previous caesarean section and previous or preexisting medical conditions where ¥ is shown, or just

Model 3b - adjusted for socio-demographic factors (Ethnic group, marital status, socio-economic group, body mass index and smoking status) plus previous medical history (previous uterine surgery not including previous caesarean section and previous or preexisting medical conditions where ¥ is shown, or just

Model 3c - adjusted for socio-demographic factors (Ethnic group, marital status, socio-economic group, body mass index and smoking status) plus previous medical history (previous uterine surgery not including previous caesarean section and previous or preexisting medical conditions where ¥ is shown, or just

Model 3d - adjusted for socio-demographic factors (Ethnic group, marital status, socio-economic group, body mass index and smoking status) plus previous medical history (previous uterine surgery not including previous caesarean section and previous or preexisting medical conditions where ¥ is shown, or just

Statistically significant values are bolded
