# Supplementary figures and images for: Pregnancy at very advanced maternal age: a UK population‐based cohort study
Source: PubMed Central journal article supplement — BJOG. 2016 Sep 1;124(7):1097–106. doi: 10.1111/1471-0528.14269 (PMC5484369; doi:10.1111/1471-0528.14269), 2016-09-01

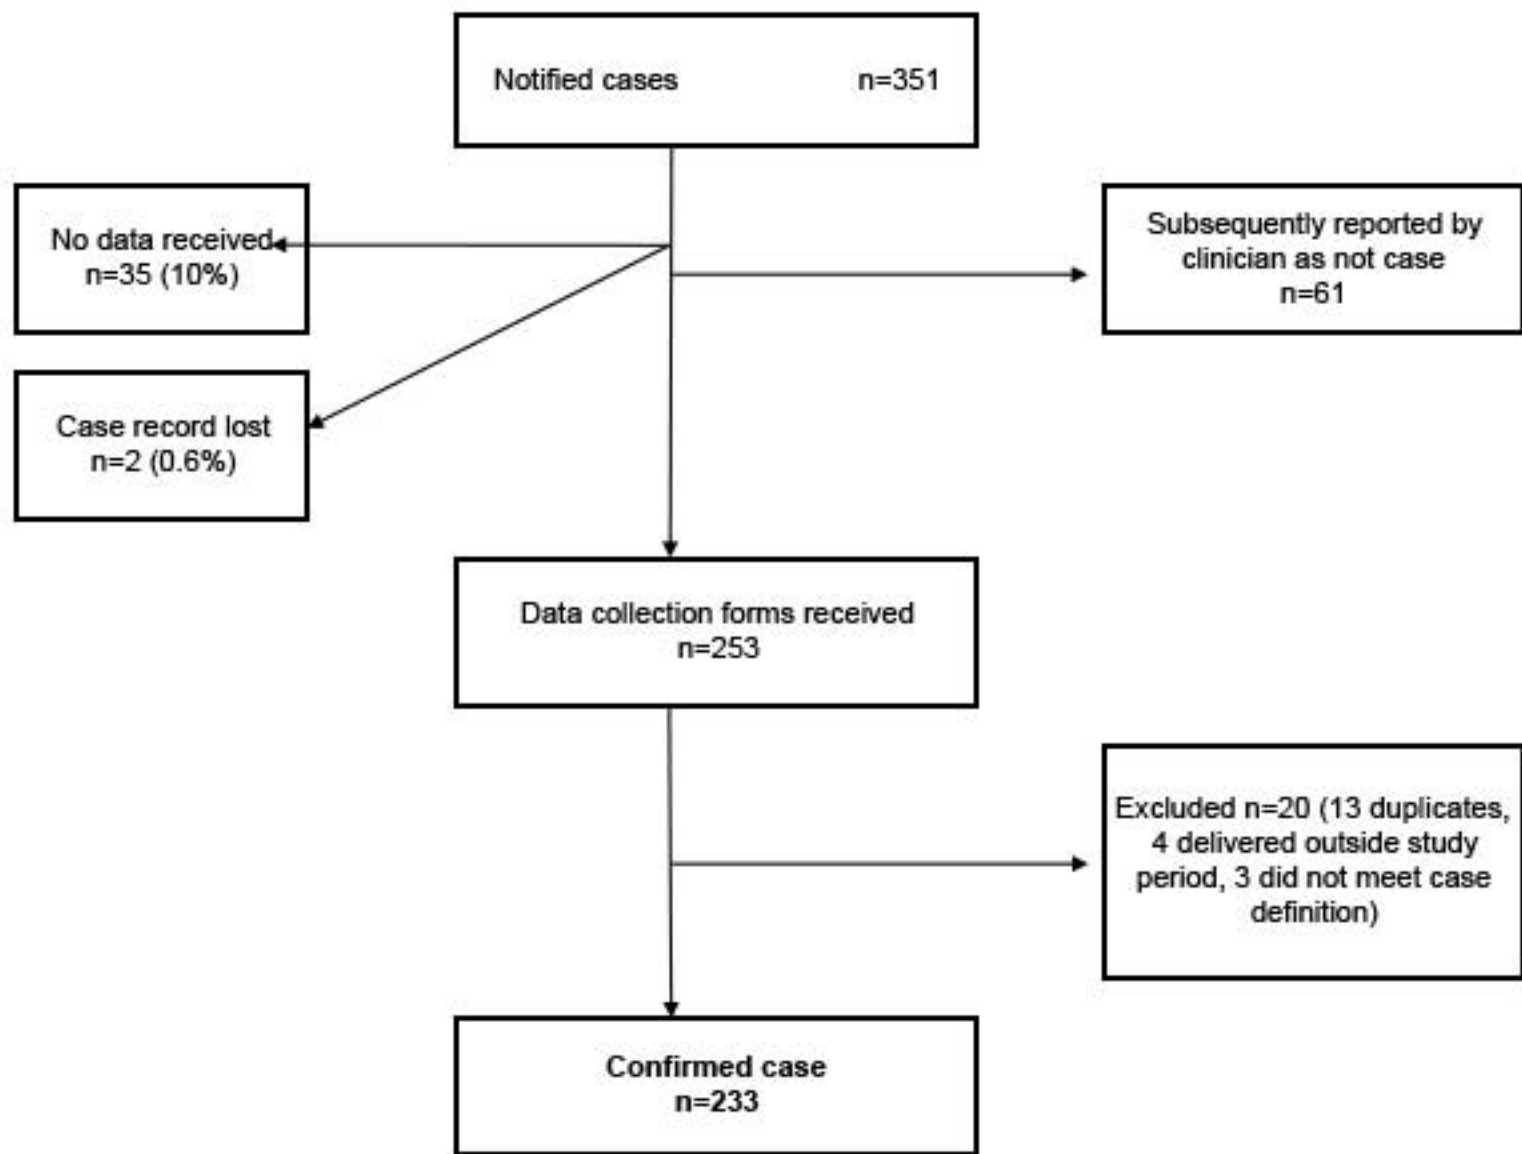

Figure S1. Case reporting and completeness of data collection

Supplement: BJO-124-1097-s001.pdf [file BJO-124-1097-s001.pdf]
